# Supplementary material for: The Influence of High Dose Parenteral Vitamin C Supplementation on Incidence and Severity of Postoperative Pulmonary Complications after Cardiac Surgery with Extracorporeal Circulation: A Prospective, Randomized, Single-Blinded, Interventional Study
Source: Preprints.org preprint supplement (doi:10.20944/preprints202401.2195.v1), 2024-01-31

## Supplement 1

**Table S1:** PPC severity score (modified from references in text [\[39-42\]](#))

| PPC Score                          | Operational Definitions                                                                                                                                                                                                                                                                                                                                                                                                                                                                                                                                                                                                                                                                                                                                                                                          |
|------------------------------------|------------------------------------------------------------------------------------------------------------------------------------------------------------------------------------------------------------------------------------------------------------------------------------------------------------------------------------------------------------------------------------------------------------------------------------------------------------------------------------------------------------------------------------------------------------------------------------------------------------------------------------------------------------------------------------------------------------------------------------------------------------------------------------------------------------------|
| <b>Grade 0</b>                     | No PPC                                                                                                                                                                                                                                                                                                                                                                                                                                                                                                                                                                                                                                                                                                                                                                                                           |
| <b>Grade 1</b><br>(1 of the items) | <ul style="list-style-type: none"> <li>• a dry cough</li> <li>• micro atelectasis: abnormal auscultatory findings and temperature <math>\geq 37.5^{\circ}\text{C}</math> without another documented cause with normal X-ray of the lungs</li> <li>• dyspnea without another documented cause</li> </ul>                                                                                                                                                                                                                                                                                                                                                                                                                                                                                                          |
| <b>Grade 2</b><br>(2 of the items) | <ul style="list-style-type: none"> <li>• productive cough without another documented cause</li> <li>• bronchospasm - new wheezing or old wheezing that requires a change in therapy</li> <li>• hypoxemia in room air (<math>\text{SpO}_2 \leq 90\%</math>)</li> <li>• radiologically confirmed atelectasis (two independent experts) plus: temperature <math>&gt;37.5^{\circ}\text{C}</math> or abnormal auscultatory findings</li> <li>• hypercarbia requiring treatment (<math>\text{PaCO}_2 &gt; 50</math> mm Hg)</li> </ul>                                                                                                                                                                                                                                                                                  |
| <b>Grade 3</b><br>(1 of the items) | <ul style="list-style-type: none"> <li>• pleural effusion requiring thoracentesis</li> <li>• pneumonia: radiological confirmation (two independent experts) plus clinical symptoms (two of the following: leukocytosis or leukopenia, abnormal temperature, purulent discharge) plus isolation of the causative agent (G+ or G- culture) or necessary change of antibiotic therapy</li> <li>• pneumothorax</li> <li>• prolonged non-invasive ventilation due to all three reasons: a) <math>\text{SpO}_2 \leq 92\%</math> on oxygen supplementation, b) oxygen supplementation <math>&gt;5\text{L}</math>, c) <math>\text{RR} \geq 30</math> bpm</li> <li>• postoperative intubation or reintubation, i.e. dependence on mechanical ventilation (invasive or non-invasive) lasting less than 48 hours</li> </ul> |
| <b>Grade 4</b>                     | Ventilatory insufficiency: postoperative dependence on mechanical ventilation for more than 48 hours or reintubation with subsequent dependence on mechanical ventilation for more than 48 hours                                                                                                                                                                                                                                                                                                                                                                                                                                                                                                                                                                                                                 |
| <b>Grade 5</b>                     | Death before hospital discharge                                                                                                                                                                                                                                                                                                                                                                                                                                                                                                                                                                                                                                                                                                                                                                                  |

**Figure S1:** PPC by grade.

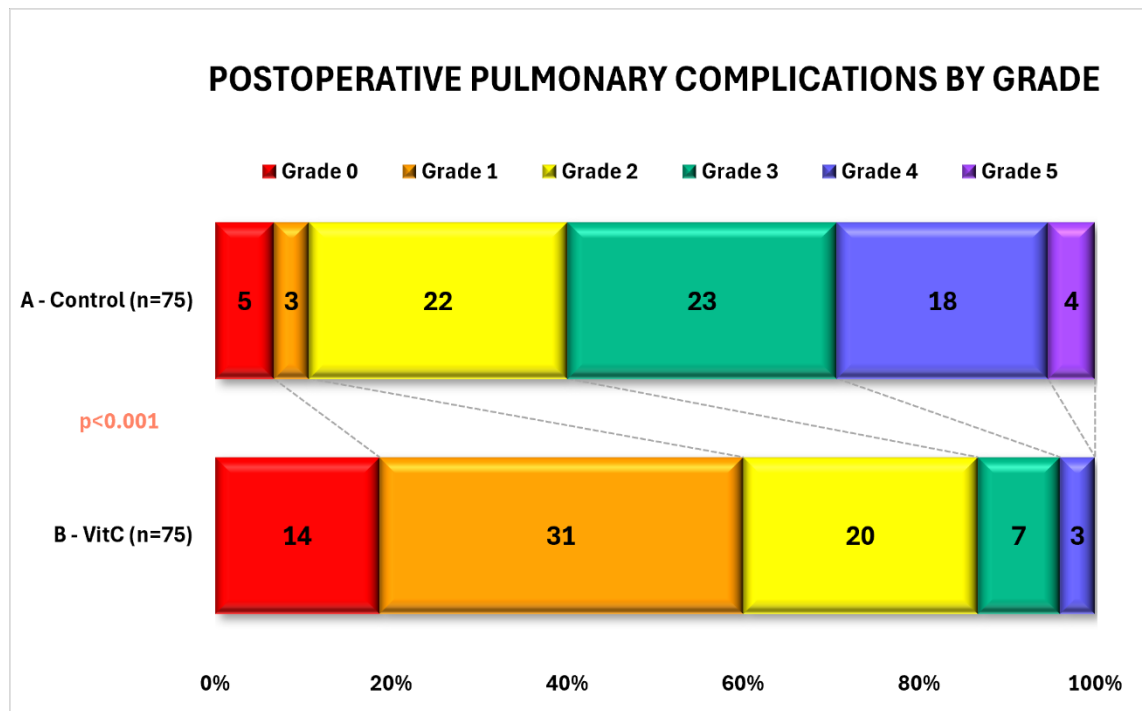

Figure S2: Dynamics of inflammatory markers

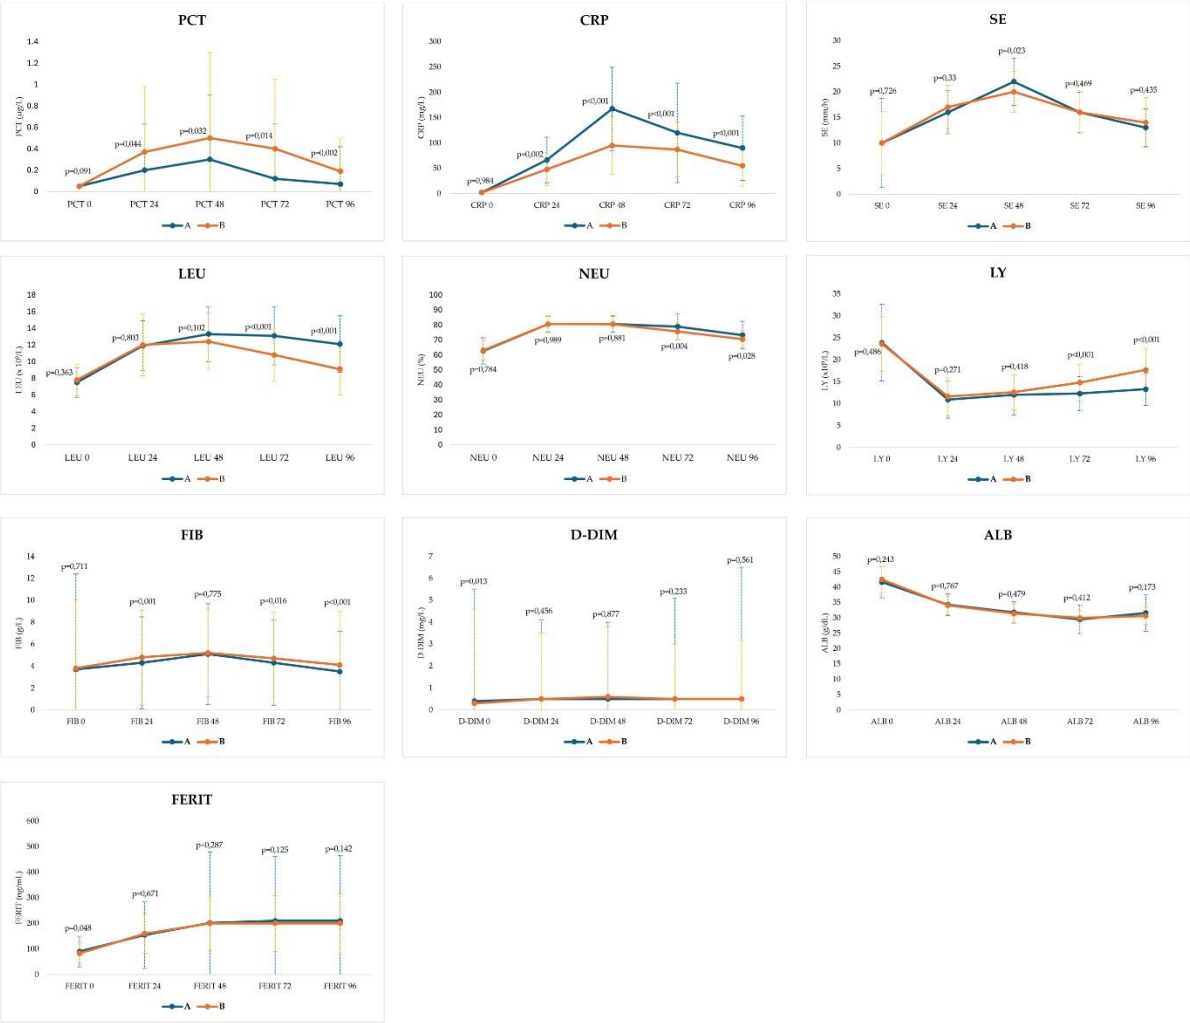

**Figure S3:** Dynamics of GFR < 60mL/min

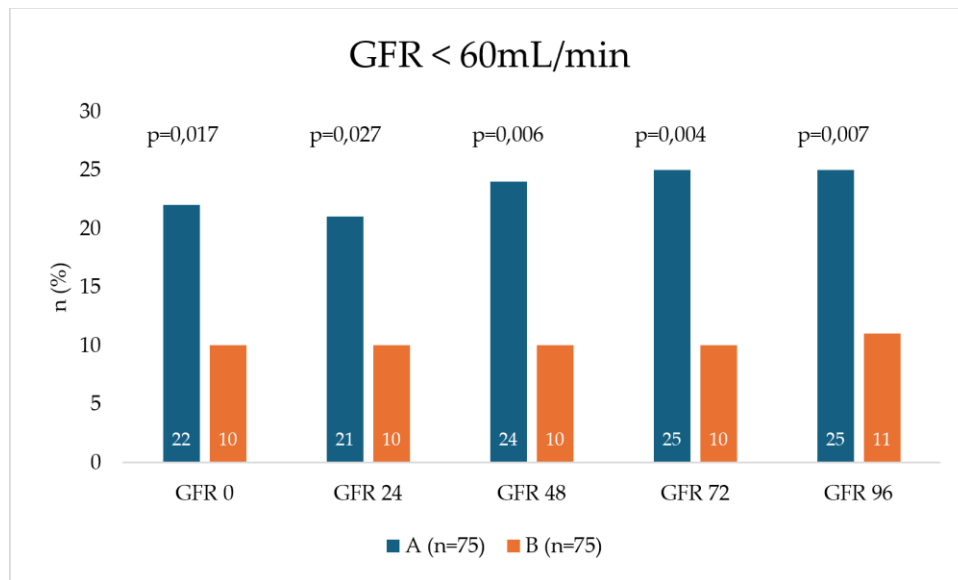

Supplement: Supplementary file 1 [file supplementary]
