# Supplementary material for: The Influence of High Dose Parenteral Vitamin C Supplementation on Incidence and Severity of Postoperative Pulmonary Complications after Cardiac Surgery with Extracorporeal Circulation: A Prospective, Randomized, Single-Blinded, Interventional Study
Source: Preprints.org preprint supplement (doi:10.20944/preprints202401.2195.v1), 2024-01-31

**Supplement 1**

**Table S1:** PPC severity score (modified from references in text [39-42]

| **PPC Score** | **Operational Definitions** |
| --- | --- |
| **Grade 0** | No PPC |
| **Grade 1**  (1 of the items) | - a dry cough - micro atelectasis: abnormal auscultatory findings and temperature ≥ 37.5°C without another documented cause with normal X-ray of the lungs - dyspnea without another documented cause |
| **Grade 2**  (2 of the items) | - productive cough without another documented cause - bronchospasm - new wheezing or old wheezing that requires a change in therapy - hypoxemia in room air (SpO2 ≤ 90%) - radiologically confirmed atelectasis (two independent experts) plus: temperature >37.5°C or abnormal auscultatory findings - hypercarbia requiring treatment (PaCO2>50 mm Hg) |
| **Grade 3**  (1 of the items) | - pleural effusion requiring thoracentesis - pneumonia: radiological confirmation (two independent experts) plus clinical symptoms (two of the following: leukocytosis or leukopenia, abnormal temperature, purulent discharge) plus isolation of the causative agent (G+ or G- culture) or necessary change of antibiotic therapy - pneumothorax - prolonged non-invasive ventilation due to all three reasons: a) SpO2 ≤ 92% on oxygen supplementation, b) oxygen supplementation >5L, c) RR≥30 bpm - postoperative intubation or reintubation, i.e. dependence on mechanical ventilation (invasive or non-invasive) lasting less than 48 hours |
| **Grade 4** | Ventilatory insufficiency: postoperative dependence on mechanical ventilation for more than 48 hours or reintubation with subsequent dependence on mechanical ventilation for more than 48 hours |
| **Grade 5** | Death before hospital discharge |

**Figure S1:** PPC by grade**.**

**
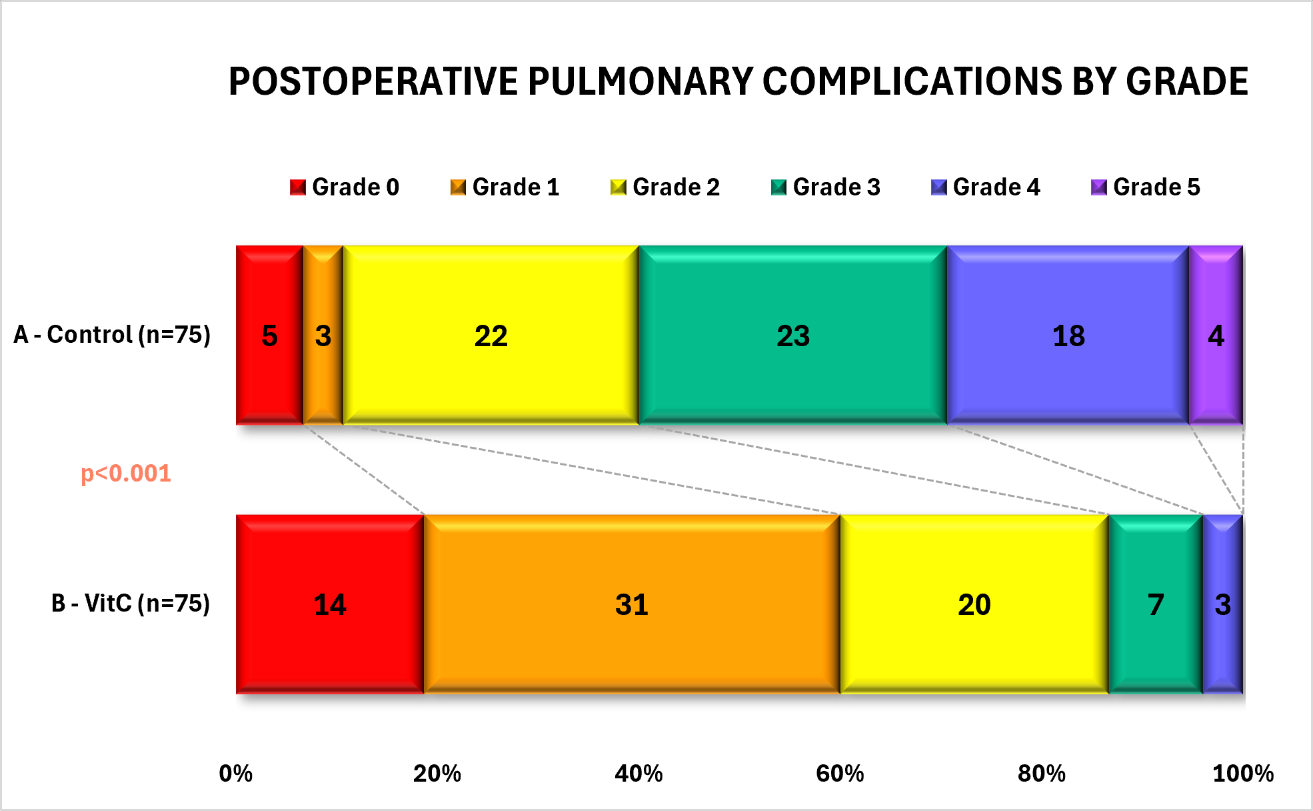
**

**Figure S2:** Dynamics of inflammatory markers


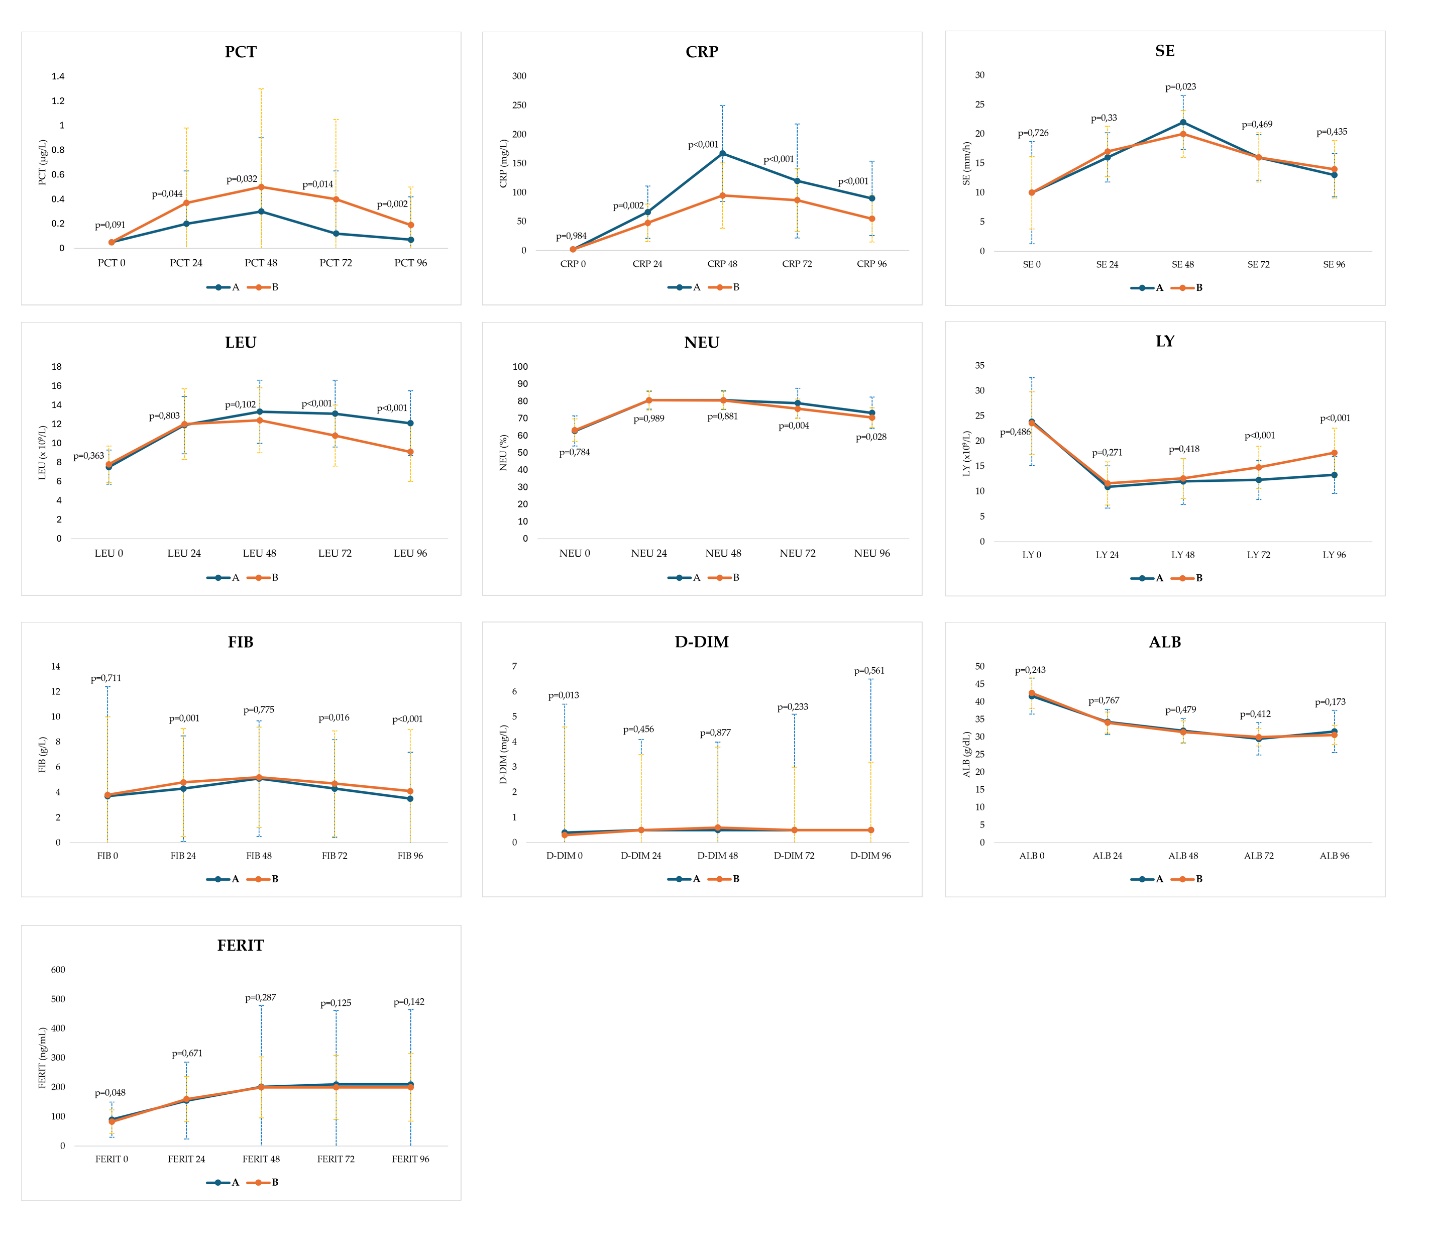


**Figure S3:** Dynamics of GFR < 60mL/min


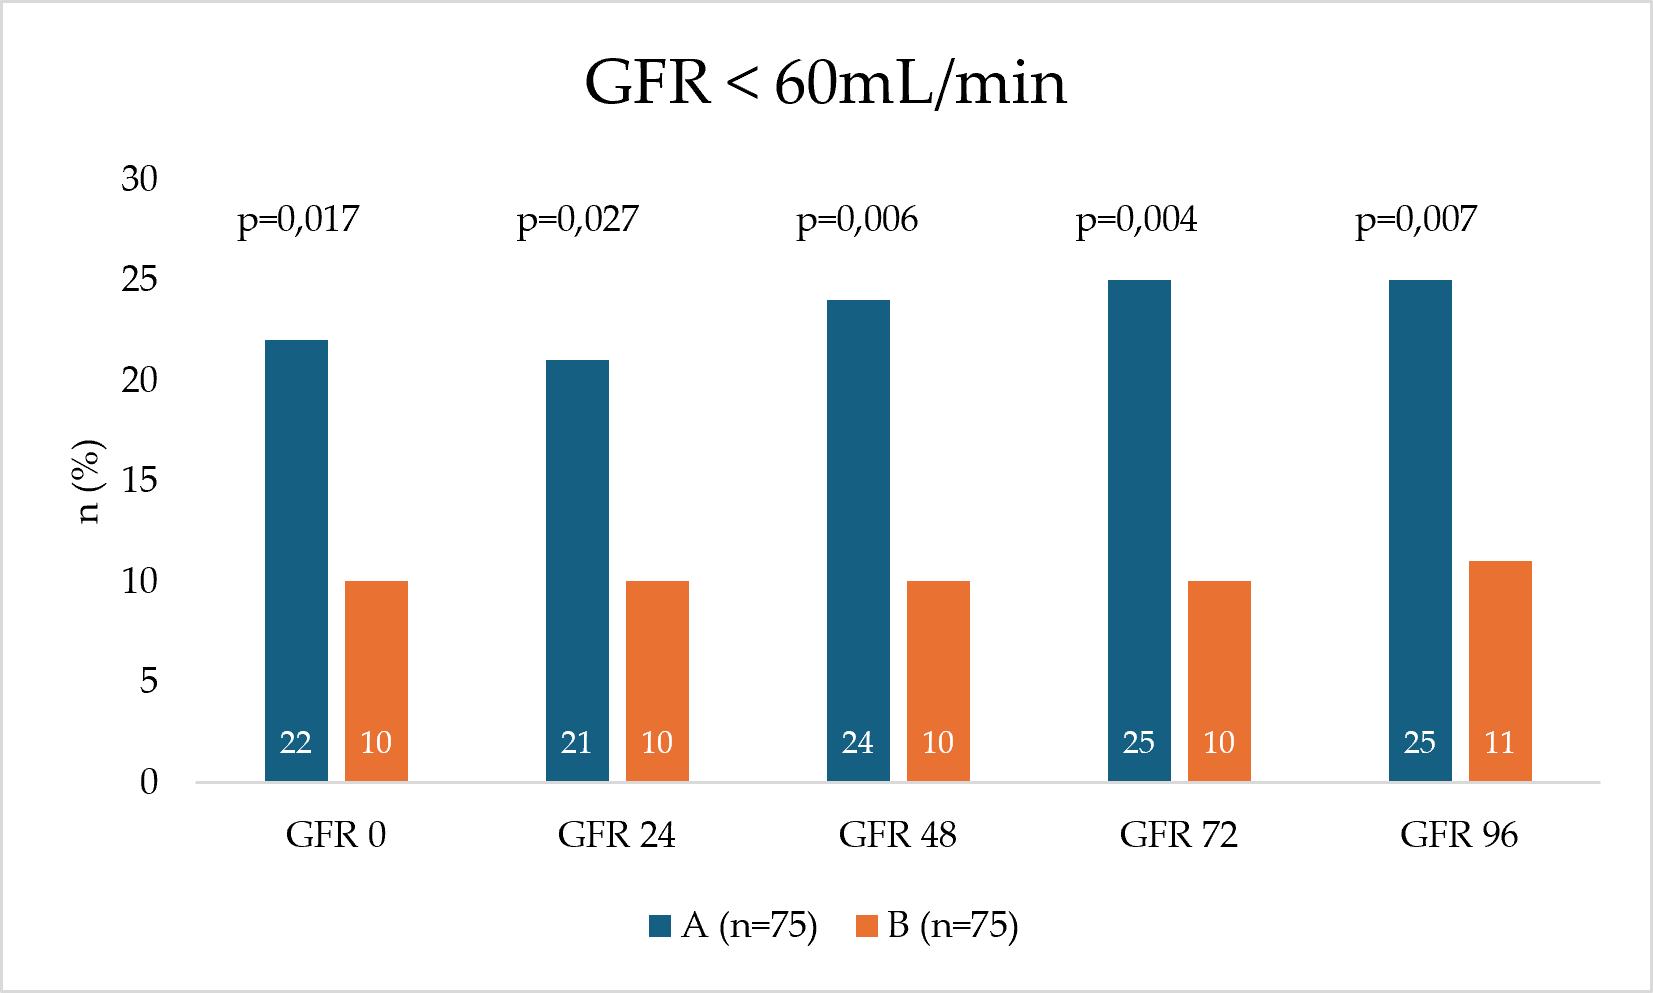

Supplement: Supplementary file 1 [file supplementary]
